# Supplementary material for: Dinuclear copper(i) complexes with N-heterocyclic thione and selone ligands: synthesis, characterization, and electrochemical studies
Source: Royal Society of Chemistry journal article supplement (doi:10.1039/c5dt02232k), 2015-01-01
Supplement: c5dt02232k1.pdf [file c5dt02232k1.pdf]

Electronic Supplementary Information (ESI) for

**Dinuclear Copper(I) Complexes with *N*-Heterocyclic Thione and Selone  
Ligands: Synthesis, Characterization, and Electrochemical Studies**

Martin M. Kimani<sup>a</sup>, David Watts<sup>a</sup>, Leigh A. Graham<sup>b</sup>, Daniel Rabinovich<sup>b</sup>,

Glenn P. A. Yap<sup>c</sup>, and Julia L. Brumaghim<sup>a,\*</sup>

<sup>a</sup> Department of Chemistry, Clemson University, Clemson SC 29634-0973, USA

<sup>b</sup> Department of Chemistry, The University of North Carolina at Charlotte, 9201 University City Boulevard, Charlotte, NC 28223, USA

<sup>c</sup> Department of Chemistry and Biochemistry, The University of Delaware, Newark, DE 19716, USA

**Table of Contents**

**Fig. S1** Crystal packing diagram showing infinite chains of [(Bmm<sup>Me</sup>)Cu(μ-dmit)]<sub>n</sub>(BF<sub>4</sub>)<sub>n</sub> (**10**) showing 50% probability density ellipsoids and the H-F short-contact interactions along the *a*-axis. .... 2

**Fig. S2** Cyclic voltammetry (CV) scans for A) [Cu<sub>2</sub>(dmit)<sub>3</sub>](BF<sub>4</sub>)<sub>2</sub> (**1**), B) [Cu<sub>2</sub>(dmise)<sub>3</sub>](BF<sub>4</sub>)<sub>2</sub> (**2**), C) [Cu<sub>2</sub>(Bmm<sup>Me</sup>)<sub>3</sub>](BF<sub>4</sub>)<sub>2</sub> (**3**), D) [Cu<sub>2</sub>(Bsem<sup>Me</sup>)<sub>3</sub>](BF<sub>4</sub>)<sub>2</sub> (**4**), E) [Cu<sub>2</sub>(Bme<sup>Me</sup>)<sub>3</sub>](BF<sub>4</sub>)<sub>2</sub> (**5**), F) [Cu<sub>2</sub>(Bsee<sup>Me</sup>)<sub>3</sub>](BF<sub>4</sub>)<sub>2</sub> (**6**), G) [(dmit)Cu(μ-Bsem<sup>Me</sup>)<sub>2</sub>Cu(dmit)](BF<sub>4</sub>)<sub>2</sub> (**7**), H) [(dmise)Cu(μ-Bmm<sup>Me</sup>)<sub>2</sub>Cu(dmise)](BF<sub>4</sub>)<sub>2</sub> (**8**), I) [(dmise)Cu(μ-Bsem<sup>Me</sup>)<sub>2</sub>Cu(dmise)](BF<sub>4</sub>)<sub>2</sub> (**9**), J) [(Bmm<sup>Me</sup>)Cu(μ-dmit)]<sub>n</sub>(BF<sub>4</sub>)<sub>n</sub> (**10**), K) dmit, L) dmise. All data were collected with 1 mM compound in acetonitrile with *n*-butylammonium phosphate as the supporting electrolyte (0.1 M) and a scan rate of 100 mV/s. .... 3-4

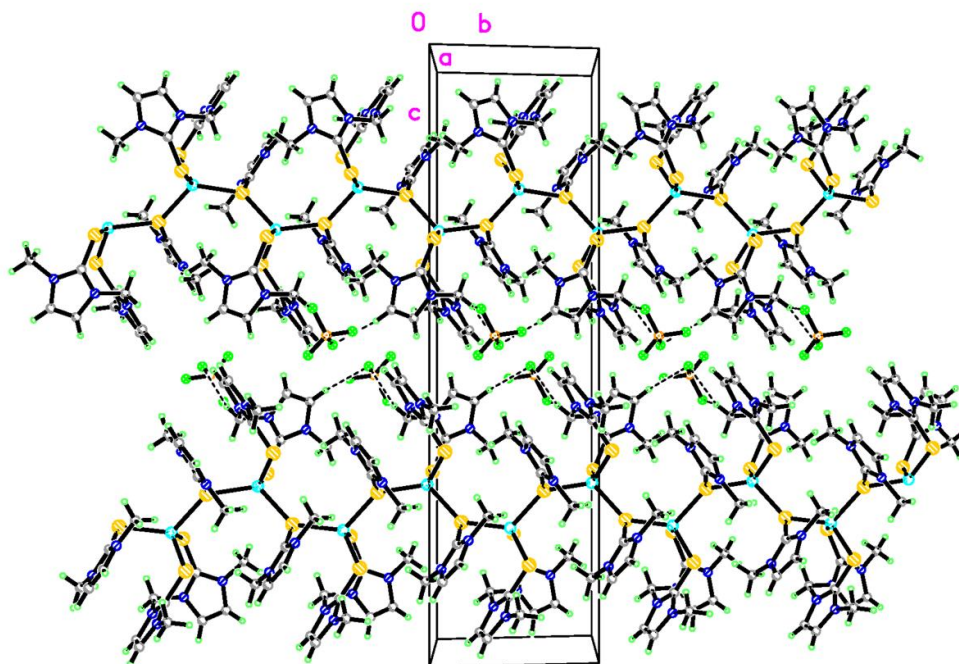

**Fig. S1.** Crystal packing diagram showing infinite chains of  $[(Bmm^{Me})Cu(\mu-dmit)]_n(BF_4)_n$  (**10**) showing 50% probability density ellipsoids and the H-F short-contact interactions along the  $a$ -axis.

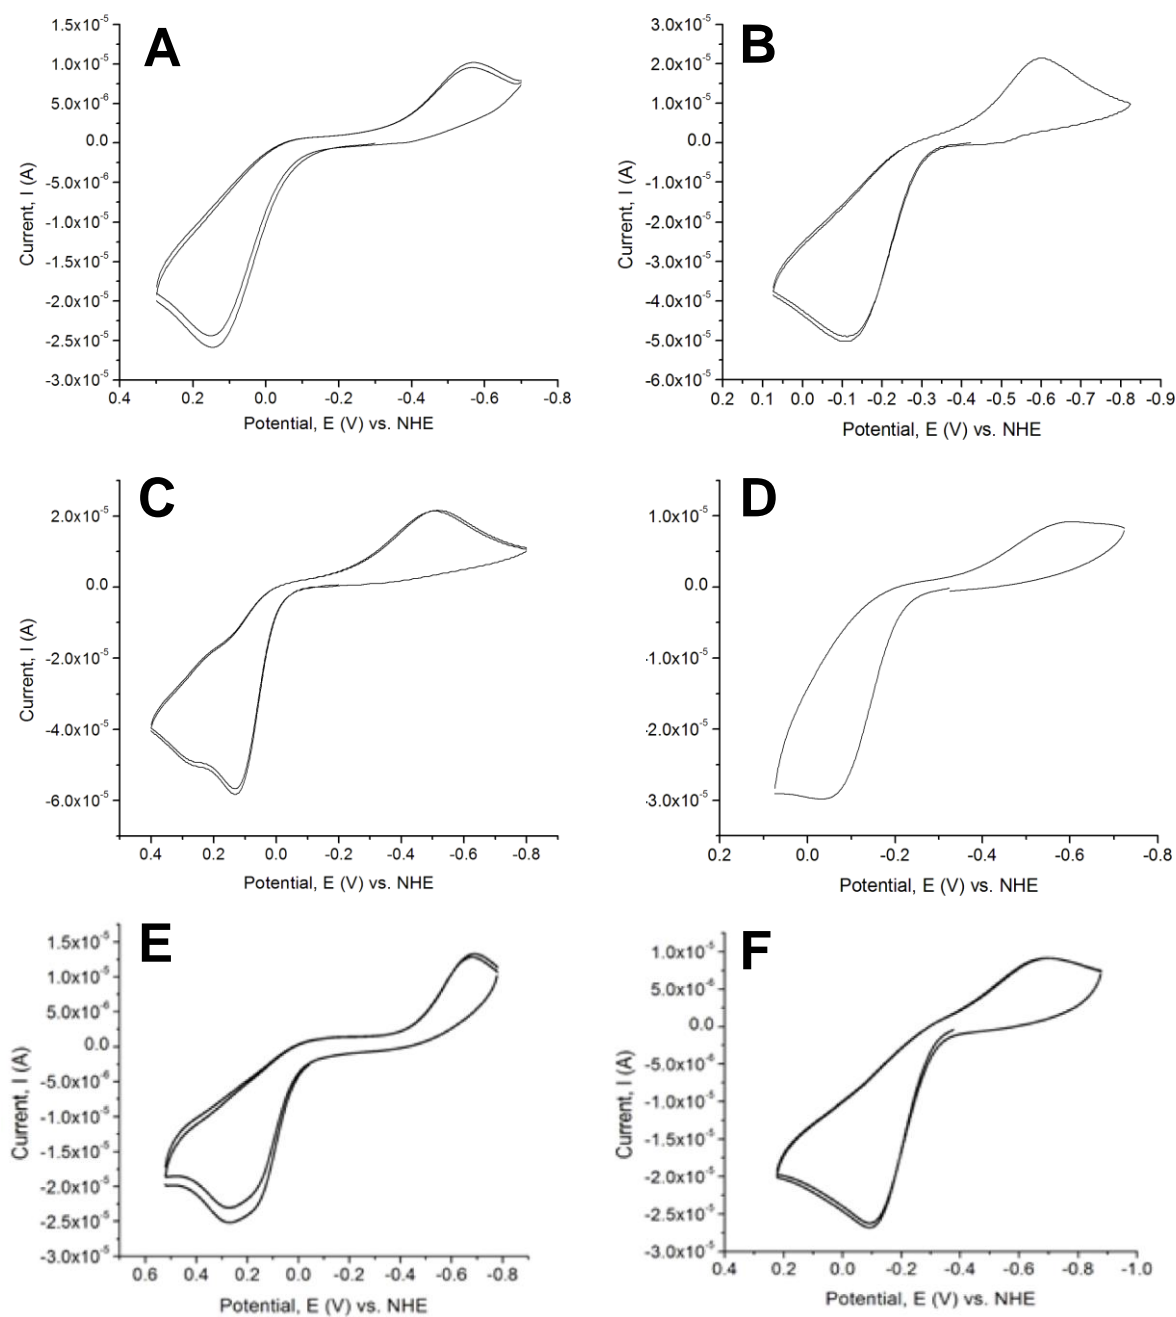

**Fig. S2.** Cyclic voltammety (CV) scans for A)  $[\text{Cu}_2(\text{dmit})_3](\text{BF}_4)_2$  (**1**), B)  $[\text{Cu}_2(\text{dmise})_3](\text{BF}_4)_2$  (**2**), C)  $[\text{Cu}_2(\text{Bmm}^{\text{Me}})_3](\text{BF}_4)_2$  (**3**), D)  $[\text{Cu}_2(\text{Bsem}^{\text{Me}})_3](\text{BF}_4)_2$  (**4**), E)  $[\text{Cu}_2(\text{Bme}^{\text{Me}})_3](\text{BF}_4)_2$  (**5**), F)  $[\text{Cu}_2(\text{Bsee}^{\text{Me}})_3](\text{BF}_4)_2$  (**6**). All data were collected with 1 mM compound in acetonitrile with *n*-butylammonium phosphate as the supporting electrolyte (0.1 M) and a scan rate of 100 mV/s.

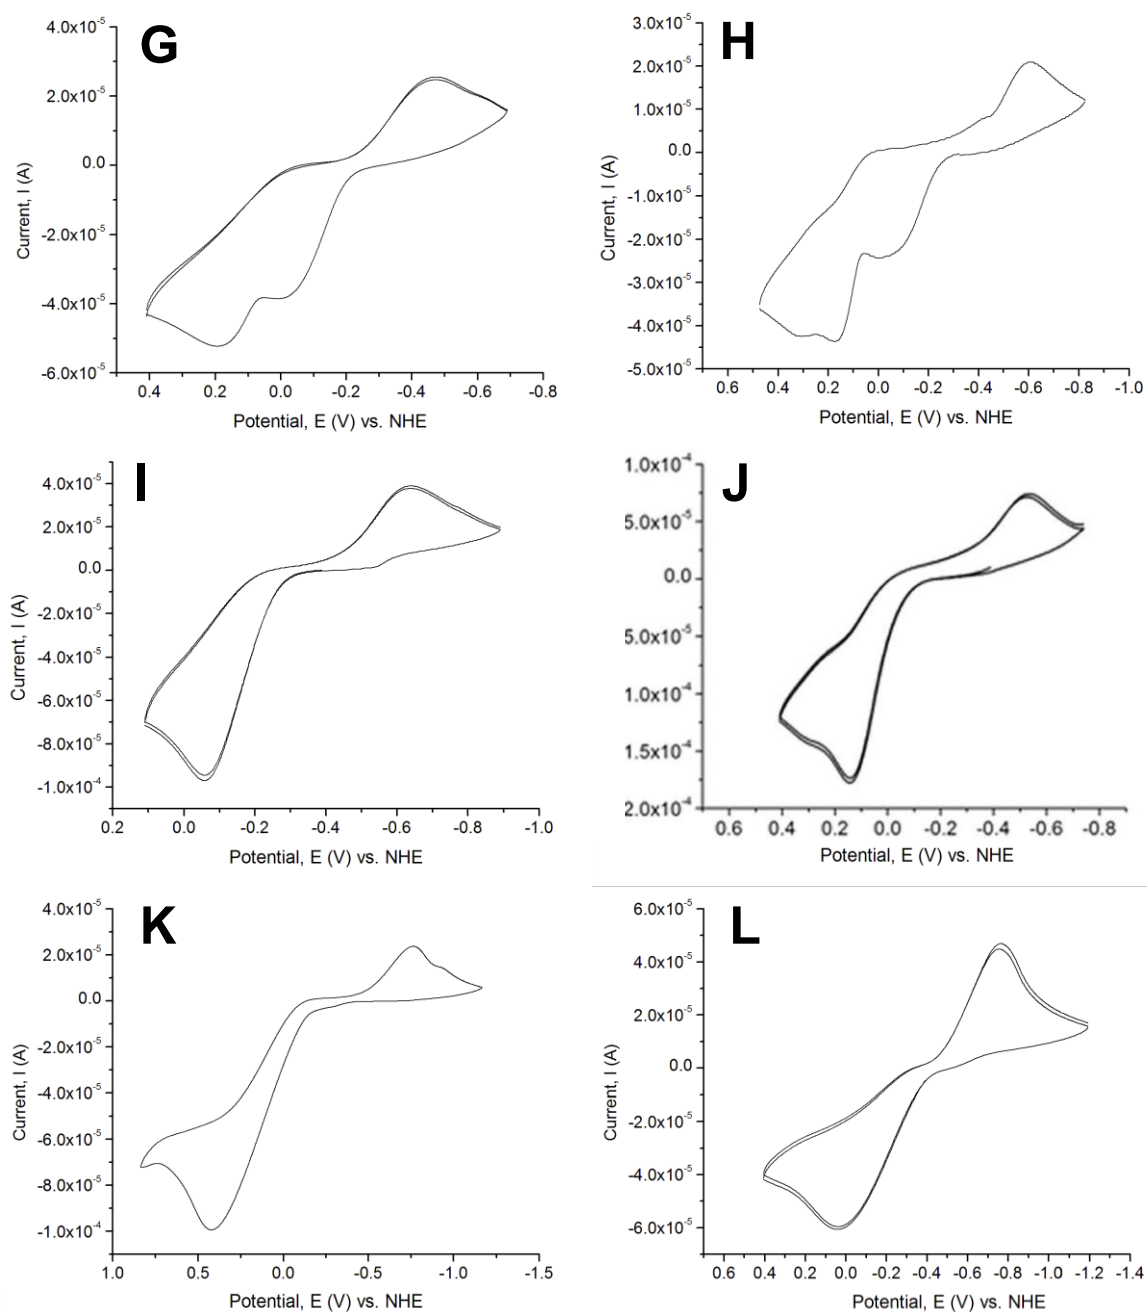

**Fig. S2 (cont.).** Cyclic voltammetry (CV) scans for G [(dmit)Cu( $\mu$ -Bsem<sup>Me</sup>)<sub>2</sub>Cu(dmit)](BF<sub>4</sub>)<sub>2</sub> (**7**), H [(dmise)Cu( $\mu$ -Bmm<sup>Me</sup>)<sub>2</sub>Cu(dmise)](BF<sub>4</sub>)<sub>2</sub> (**8**), I [(dmise)Cu( $\mu$ -Bsem<sup>Me</sup>)<sub>2</sub>Cu(dmise)](BF<sub>4</sub>)<sub>2</sub> (**9**), J [(Bmm<sup>Me</sup>)Cu( $\mu$ -dmit)]<sub>n</sub>(BF<sub>4</sub>)<sub>n</sub> (**10**), K dmit, L dmise. All data were collected with 1 mM compound in acetonitrile with *n*-butylammonium phosphate as the supporting electrolyte (0.1 M) and a scan rate of 100 mV/s.
